# Supplementary material
Source: MDPI journal article supplement (https://www.mdpi.com/2072-4292/13/19/3976)

# Tabular machine learning model prediction distribution

A) DNN prediction on 2017

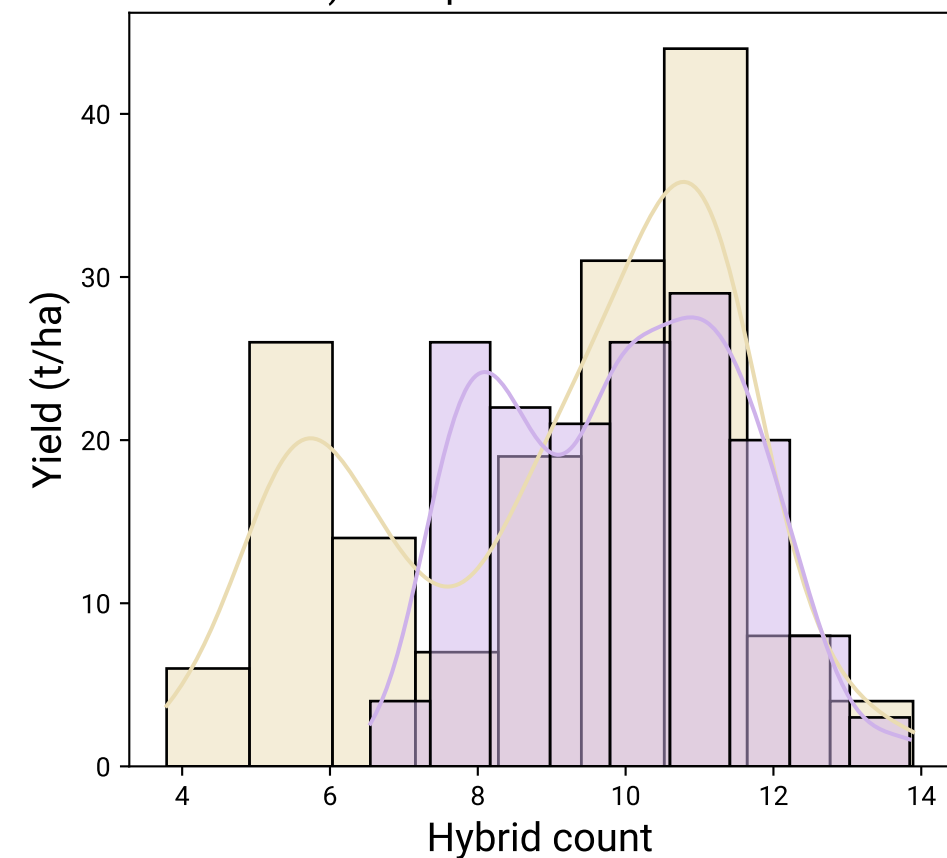

B) DNN prediction on 2018

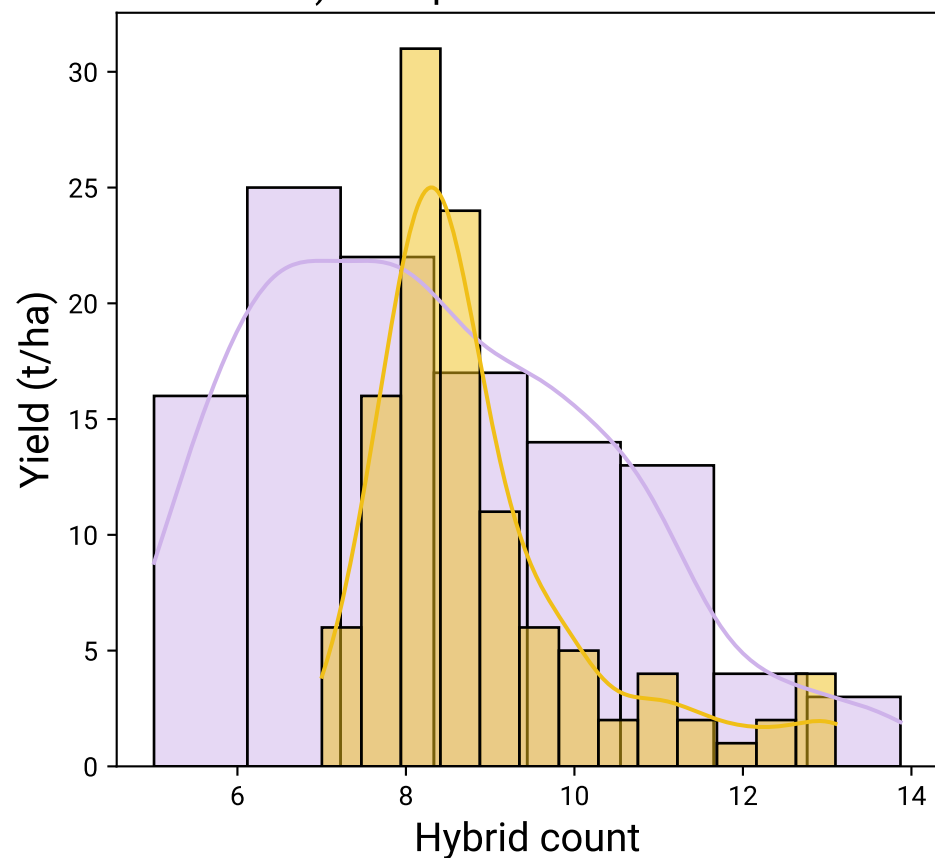

C) DNN prediction on 2019

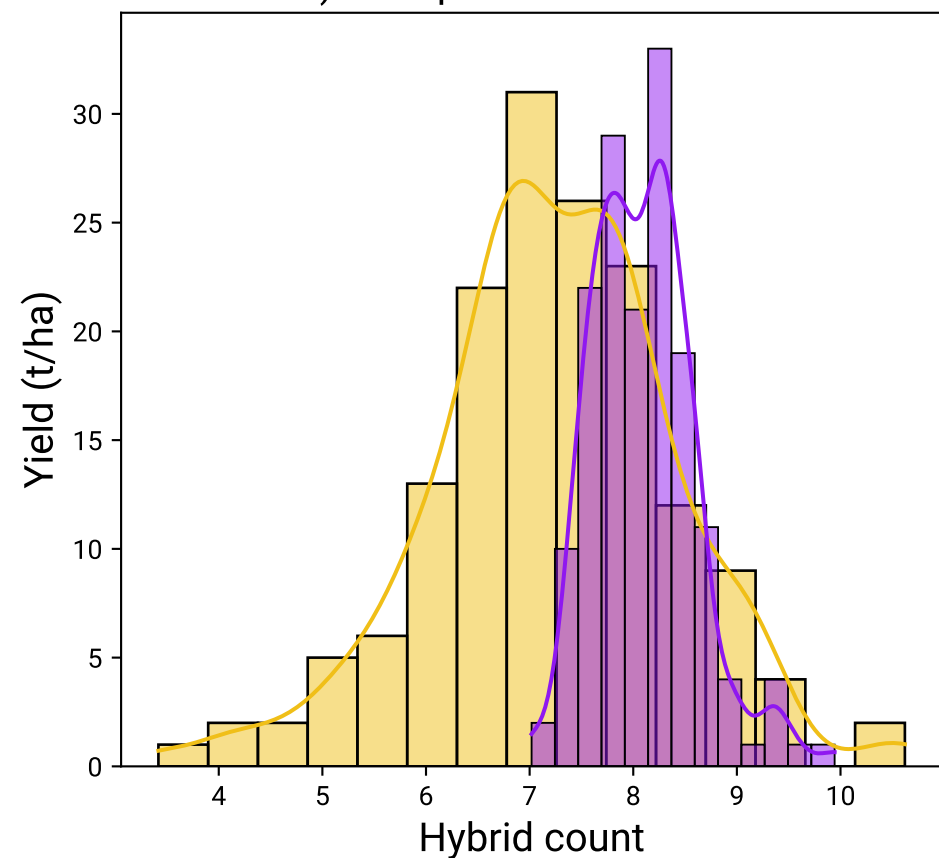

D) XGBoost prediction on 2017

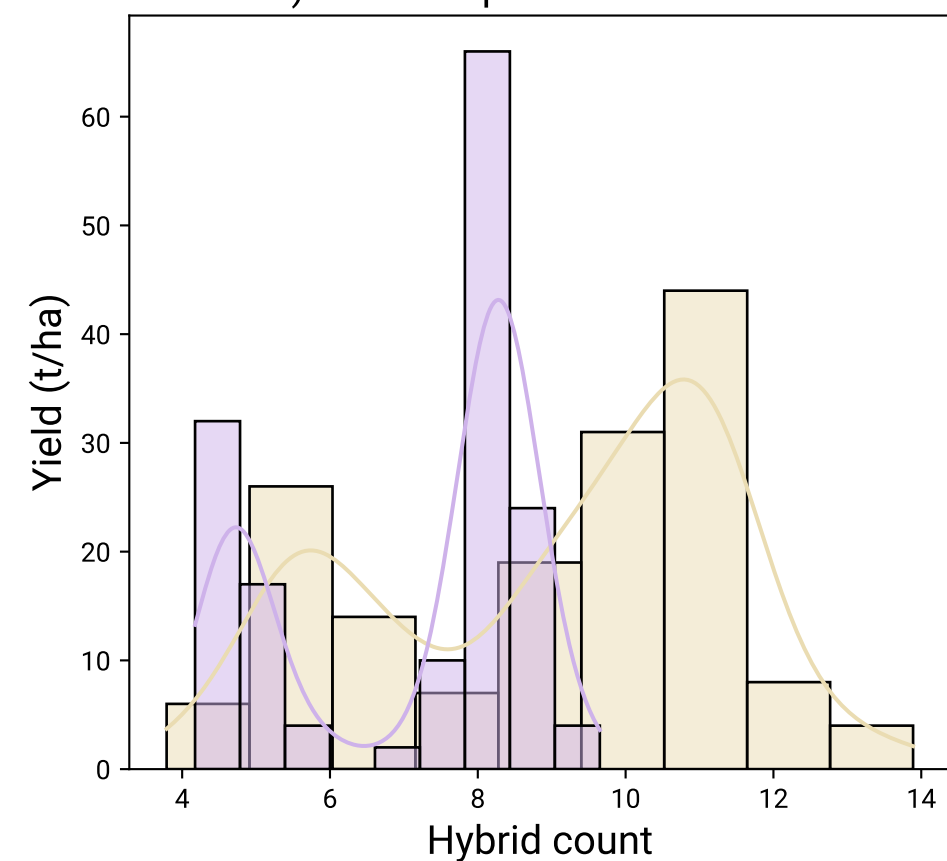

E) XGBoost prediction on 2018

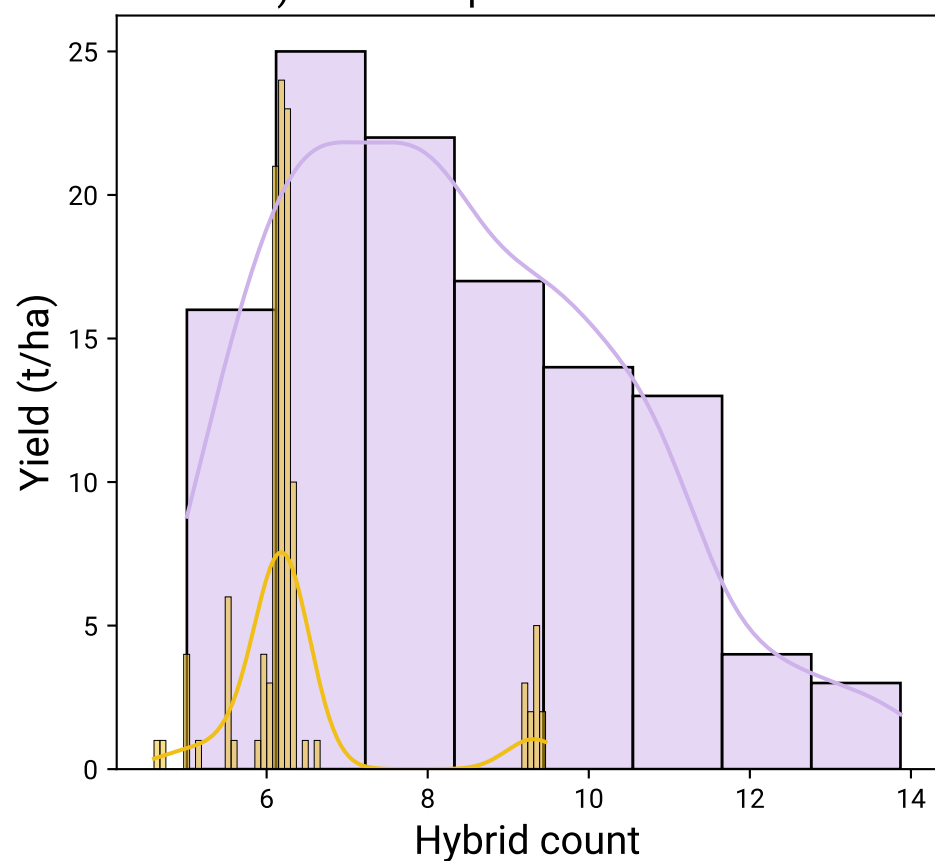

F) XGBoost prediction on 2019

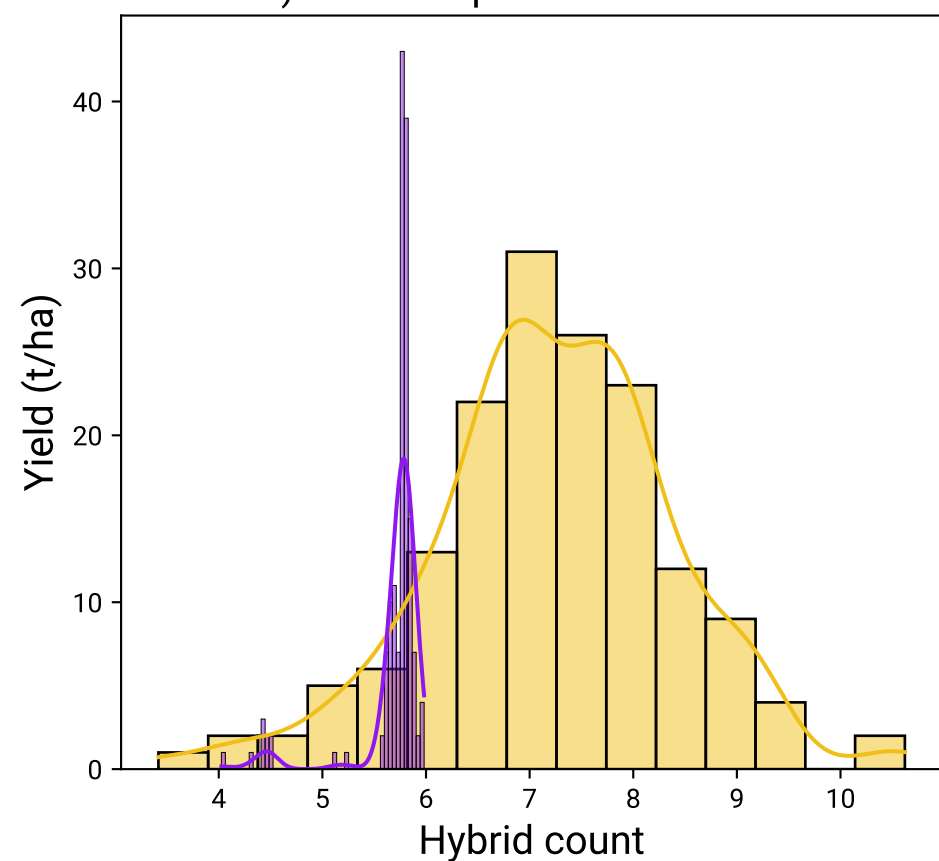

G) Random Forest prediction on 2017

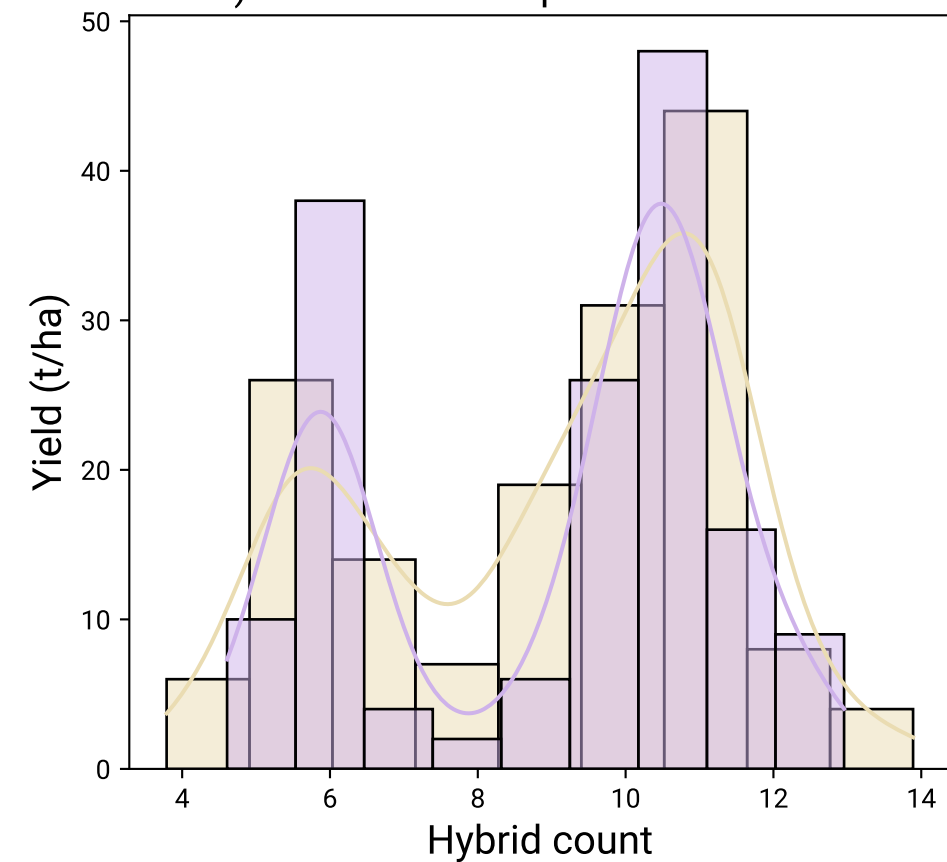

H) Random Forest prediction on 2018

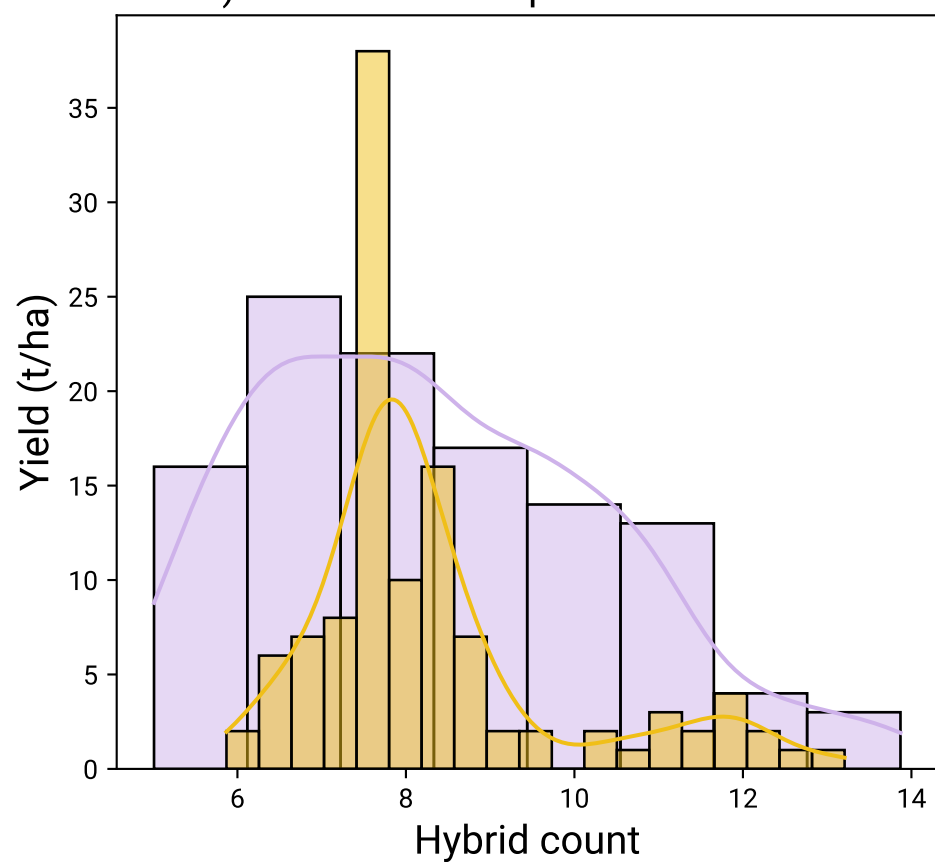

I) Random Forest prediction on 2019

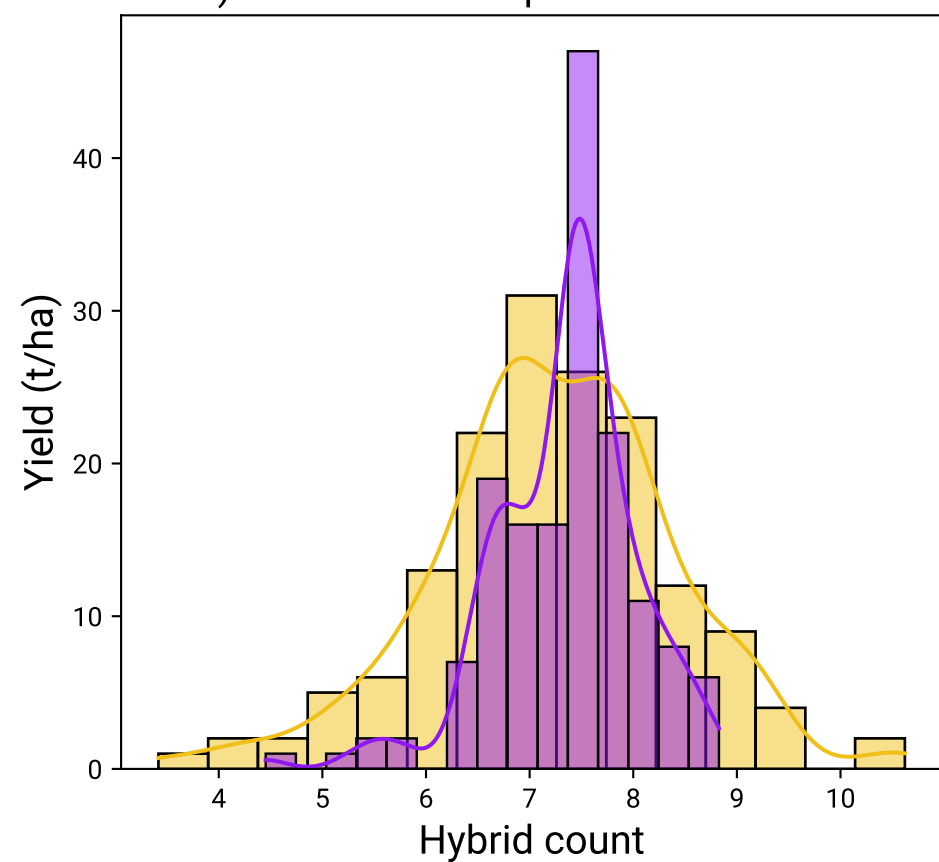

Supplement: s1 [file s1]
